# Supplementary material for: Bioactivity-Guided Separation of Potential D2 Dopamine Receptor Antagonists from Aurantii Fructus based on Molecular Docking Combined with High-Speed Counter-Current Chromatography
Source: PubMed Central journal article supplement (PMC6320876; doi:10.3390/molecules23123135), 2018-11-29
Supplement: molecules-23-03135-s001.pdf [file molecules-23-03135-s001.pdf]

## Supplementary material

**Tab.S1.** Docking score of antagonistic ability on D<sub>2</sub> dopamine receptor, potential prediction and feasibility of preparative separation of chemical compounds from *Aurantii fructus*

| No.               | Compound                                                                                        | Docking score<br>(kcal/mol) | Potential<br>prediction <sup>a</sup> | Feasibility of<br>preparative separation <sup>b</sup> |
|-------------------|-------------------------------------------------------------------------------------------------|-----------------------------|--------------------------------------|-------------------------------------------------------|
| <b>Alkaloids</b>  |                                                                                                 |                             |                                      |                                                       |
| 14                | Aminobenzoic acid                                                                               | -6.3                        |                                      |                                                       |
| 15                | Pipecolic acid                                                                                  | -5.9                        |                                      |                                                       |
| 16                | Piperidineacetic Acid                                                                           | -5.8                        |                                      |                                                       |
| 17                | Synephrine                                                                                      | -6.3                        |                                      |                                                       |
| 18                | <i>N</i> -methyltyramine                                                                        | -6.5                        |                                      |                                                       |
| 19                | Adenosine                                                                                       | -7.1                        |                                      |                                                       |
| 20                | <i>N</i> -Acetylnorsynephrine                                                                   | -7.1                        |                                      |                                                       |
| <b>Flavonoids</b> |                                                                                                 |                             |                                      |                                                       |
| 39                | Quercetin-3- <i>O</i> -rutinoside (Rutin)                                                       | -5.0                        |                                      |                                                       |
| 40                | Isovitexin-7- <i>O</i> -glucoside (Saponarin)                                                   | -4.7                        |                                      |                                                       |
| 41                | Diosmetin-6,8- <i>di-C</i> -glucoside                                                           | 0.1                         |                                      |                                                       |
| 42                | Diosmetin-6,8- <i>di-C</i> -glucoside isomer                                                    | 0.1                         |                                      |                                                       |
| 43                | Apigenin-7- <i>O</i> -rutinoside-4'- <i>O</i> -glucoside (Isorhoifolin-4'- <i>O</i> -glucoside) | -3.3                        |                                      |                                                       |
| 44                | Diosmetin-7- <i>O</i> -glucoside                                                                | -9.3                        | √                                    |                                                       |
| 45                | Luteolin-7- <i>O</i> -rutinoside (Veronicastroside)                                             | -7.5                        |                                      |                                                       |
| 46                | Apigenin-7- <i>O</i> -rutinoside (Isorhoifolin)                                                 | -7.8                        |                                      |                                                       |
| 47                | Diosmetin-7- <i>O</i> -rutinoside (Diosmin)                                                     | -8.0                        |                                      |                                                       |
| 48                | Diosmetin-7- <i>O</i> -neohesperidoside (Neodiosmin)                                            | -6.6                        |                                      |                                                       |
| 49                | Diosmetin-7- <i>O</i> -(6''- <i>O</i> -acetyl) neohesperidoside                                 | /                           |                                      |                                                       |
| 50                | Apigenin-7- <i>O</i> -neohesperidoside (Rhoifolin)                                              | -7.9                        |                                      |                                                       |
| 51                | Isovitexin-7- <i>O</i> -xylocoside-2''- <i>O</i> -arabinoside                                   | /                           |                                      |                                                       |
| 52                | Apigenin                                                                                        | -9.1                        | √                                    |                                                       |
| <b>Flavonones</b> |                                                                                                 |                             |                                      |                                                       |
| 21                | Naringenin -7- <i>O</i> -triglycoside                                                           | /                           |                                      |                                                       |

|                              |                                                                  |      |   |   |
|------------------------------|------------------------------------------------------------------|------|---|---|
| 22                           | Eriodictyol-7- <i>O</i> -rutinoside (Eriocitrin)                 | -5.5 |   | √ |
| 23                           | Eriodictyol-7- <i>O</i> -glucoside <sup>c</sup>                  | -7.3 |   |   |
| 24                           | Eriodictyol-7- <i>O</i> -neohesperidoside (Neoeriocitrin)        | -5.3 |   | √ |
| 25                           | Naringenin-7- <i>O</i> -rutinoside (Narirutin)                   | -5.5 |   | √ |
| 26                           | Naringenin-7- <i>O</i> -neohesperidoside (Naringin) <sup>c</sup> | -5.4 |   | √ |
| 27                           | Naringenin-7- <i>O</i> -glucoside                                | -7.2 |   |   |
| 28                           | Brutieridin                                                      | -1.6 |   |   |
| 29                           | Hesperetin-7- <i>O</i> -rutinoside (Hesperidin)                  | -2.8 |   | √ |
| 30                           | Hesperetin-7- <i>O</i> -neohesperidoside (Neohesperidin)         | -3.4 |   | √ |
| 31                           | Hesperetin-7- <i>O</i> -glucoside                                | -7.2 |   |   |
| 32                           | Eriodictyol                                                      | -6.7 |   |   |
| 33                           | Isosakuranetin-7- <i>O</i> -neohesperidoside (Poncirin)          | -3.2 |   | √ |
| 34                           | Isosakuranetin-7- <i>O</i> -glucoside (Isosakuranin)             | -7.4 |   |   |
| 35                           | Naringenin                                                       | -9.3 | √ | √ |
| 36                           | Melitidin                                                        | -2.9 |   |   |
| 37                           | Hesperetin                                                       | -7.0 |   |   |
| 38                           | Isosakuranetin                                                   | -6.9 |   |   |
| <b>Polymethoxyflavonoids</b> |                                                                  |      |   |   |
| 53                           | 3-Hydroxy-5,7,8-trimethoxyflavone                                | -7.7 |   |   |
| 54                           | 5-Hydroxy-6,7,3',4'-tetramethoxyflavone                          | -8.1 |   |   |
| 55                           | 5-Hydroxy-6,7,3',4',5'-pentamethoxyflavone                       | -7.7 |   |   |
| 56                           | 5,7,8,3',4'-Pentamethoxyflavone (Isosinensetin)                  | -7.5 |   |   |
| 57                           | 5,6,7,3',4'-Pentamethoxyflavone (Sinensetin)                     | -8.2 |   |   |
| 58                           | 5-Hydroxy-6,7,8,3',4'-pentamethoxyflavone (Demethylnobiletin)    | -7.3 |   |   |
| 59                           | 5,6,7,8,3',4'-Hexamethoxyflavone (Nobiletin)                     | -8.0 |   | √ |
| 60                           | 3,5,6,7,8,3',4'-Heptamethoxyflavone                              | -6.7 |   |   |
| 61                           | 5,6,7,4'-Tetramethoxyflavone                                     | -8.8 | √ |   |
| 62                           | 5-Hydroxy-3,6,7,8,3',4'-hexamethoxyflavone                       | -7.0 |   |   |
| 63                           | 5-Hydroxy-3,6,7,8-tetramethoxyflavone                            | -6.9 |   |   |
| 64                           | 5,7,8,4'-Tetramethoxyflavone                                     | -8.5 |   |   |
| 65                           | 5, 6, 7, 8, 4'-Pentamethoxyflavone (Tangeretin)                  | -8.6 | √ | √ |
| 66                           | 3-Hydroxy-5,6,7,8,3',4'-hexamethoxyflavone (Natsudaidai)         | -7.3 |   |   |
| 67                           | 5-Hydroxy-6,7,8,4'-tetramethoxyflavone                           | -8.0 |   |   |

|                       |                                                  |      |   |   |
|-----------------------|--------------------------------------------------|------|---|---|
| <b>Triterpenes</b>    |                                                  |      |   |   |
| 68                    | Limonin                                          | -3.0 |   |   |
| 69                    | Limonin-17- $\beta$ -D-glucoside                 | -4.3 |   |   |
| 70                    | Nominin-17- $\beta$ -D-glucoside                 | 2.4  |   |   |
| 71                    | Obacunoic acid-17- $\beta$ -D-glucoside          | 0.2  |   |   |
| 72                    | Nomilinic acid-17- $\beta$ -D-glucoside          | 0.0  |   |   |
| 73                    | Limonin isomer                                   | /    |   |   |
| <b>Coumarins</b>      |                                                  |      |   |   |
|                       | Meranzin hydrate                                 | -8.6 | √ | √ |
| 74                    | Phellopterin                                     | -7.5 |   |   |
| 75                    | Meranzin                                         | -7.1 |   | √ |
| 76                    | Xanthotoxol                                      | -8.3 |   |   |
| 77                    | Oxypeucedanin                                    | -7.9 |   |   |
| 78                    | Scopoletin                                       | -7.3 |   |   |
| 79                    | Epoxybergamottin                                 | -9.2 | √ |   |
| 80                    | Isomeranzin                                      | -7.4 |   | √ |
| 81                    | Osthol                                           | -7.4 |   |   |
| 82                    | Auraptene                                        | -9.1 | √ |   |
| <b>Others</b>         |                                                  |      |   |   |
| 83                    | Citric acid                                      | -5.5 |   |   |
| 84                    | 5-Hydroxymethyl furfural                         | -5.1 |   |   |
| 85                    | Paeoniflorin                                     | -6.1 |   |   |
| 86                    | Magnoloside A                                    | -7.0 |   |   |
| <b>TCM database</b>   |                                                  |      |   |   |
|                       | <i>p</i> -Ocimene                                | -6.4 |   |   |
|                       | Myrcene                                          | -6.2 |   |   |
|                       | Marmin                                           | -8.4 |   |   |
|                       | $\beta$ -sitosterol                              | -9.0 | √ |   |
|                       | 8_isopropylidene_1_5_dimethylcyclodeca_1_5_diene | -7.3 |   |   |
|                       | ZINC05224268                                     | -6.9 |   |   |
| <b>Essential oils</b> |                                                  |      |   |   |
| 87                    | <i>P</i> -Xylene                                 | -6.0 |   |   |

|     |                        |      |
|-----|------------------------|------|
| 88  | (-)- $\alpha$ -Pinene  | -6.1 |
| 89  | $\alpha$ -Phellandrene | -7.1 |
| 90  | 3-carene               | -6.3 |
| 91  | Benzene                | -4.9 |
| 92  | <i>D</i> -limonene     | -6.8 |
| 93  | Ocimene                | -6.4 |
| 94  | 4-carene               | -6.3 |
| 95  | Cyclohexene            | -4.9 |
| 96  | Linalool               | -6.5 |
| 97  | Terpineol              | -7.2 |
| 98  | Thymol                 | -7.1 |
| 99  | Limonene oxide         | -6.7 |
| 100 | Copaene                | -6.9 |
| 101 | 1.6-Cyclodecadiene     | /    |
| 102 | Naphthalene            | -7.4 |
| 103 | (+)-Aromadendrene      | -7.4 |
| 104 | 2-Naphthalenemethanol  | -7.9 |

<sup>a</sup> The docking score of the positive drug (domperidone) was 10.7 kcal/mol, so the score of candidate compounds should be less than -8.5 kcal/mol for the further separation according to drug screening principles;

<sup>b</sup> The feasibility of preparative separation of each compound was preliminarily analyzed by our previous study and related literature data.

<sup>c</sup> Before entering the body, flavonoid glycosides of AF will be hydrolyzed to metabolites in the gastrointestinal tract and then be absorbed for corresponding pharmacological effect. Therefore, as the flavonoid glycoside of naringenin, naringin should be classed to the candidate compound for preparative separation.

Fig.S1. The detailed data of isolated compounds with high purity identified by ESI-Q-TOF-MS, 1H-NMR and 13C-NMR.

### Compound 1: naringin

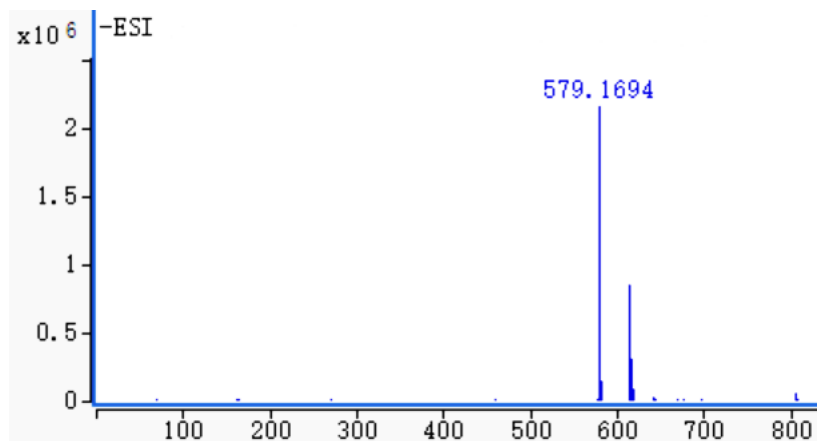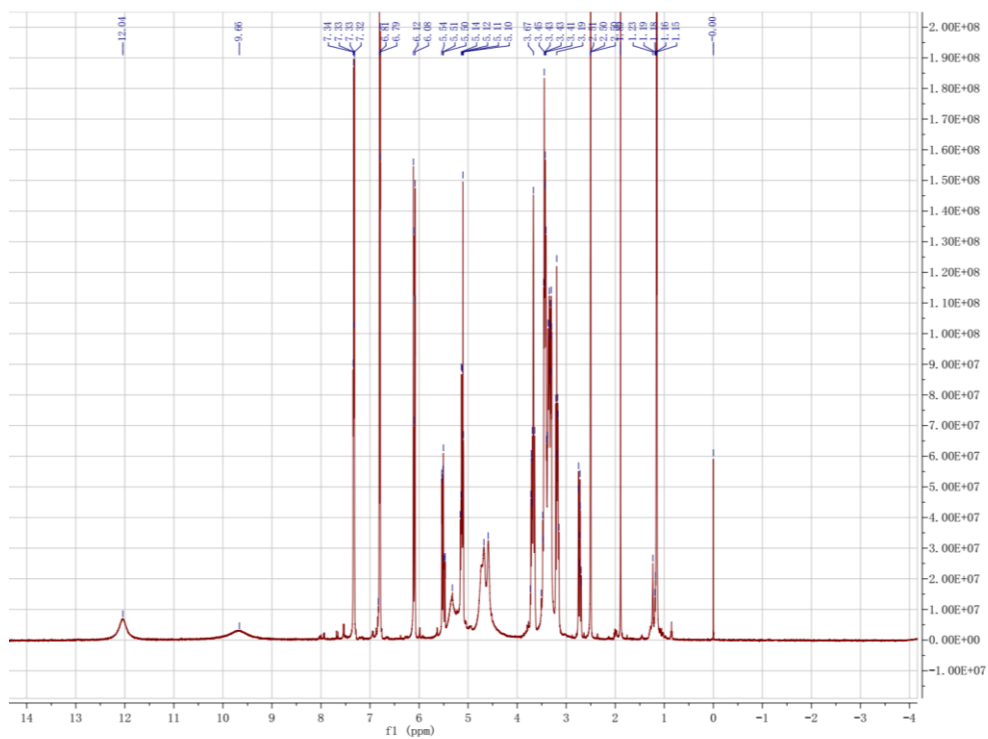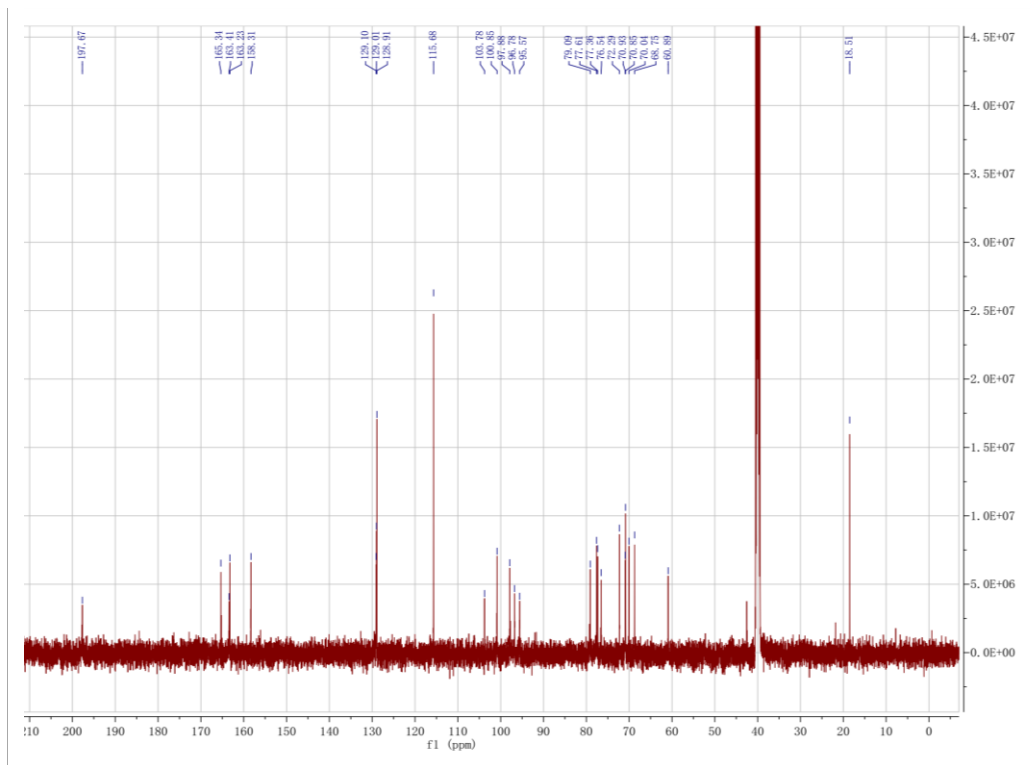

## Compound 2: neohesperidin

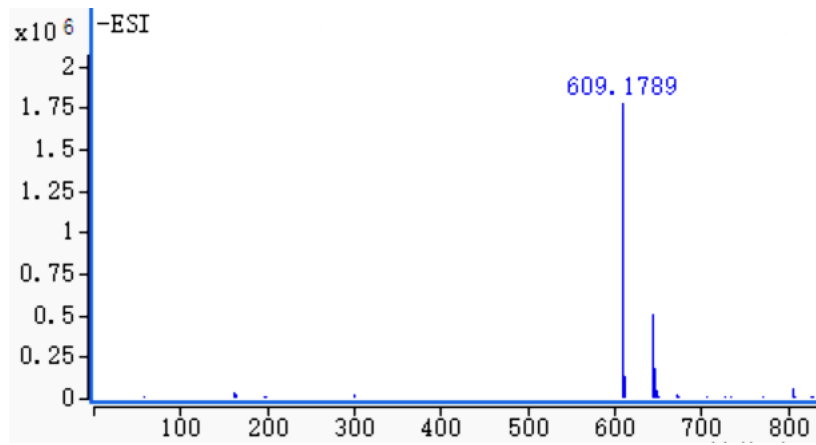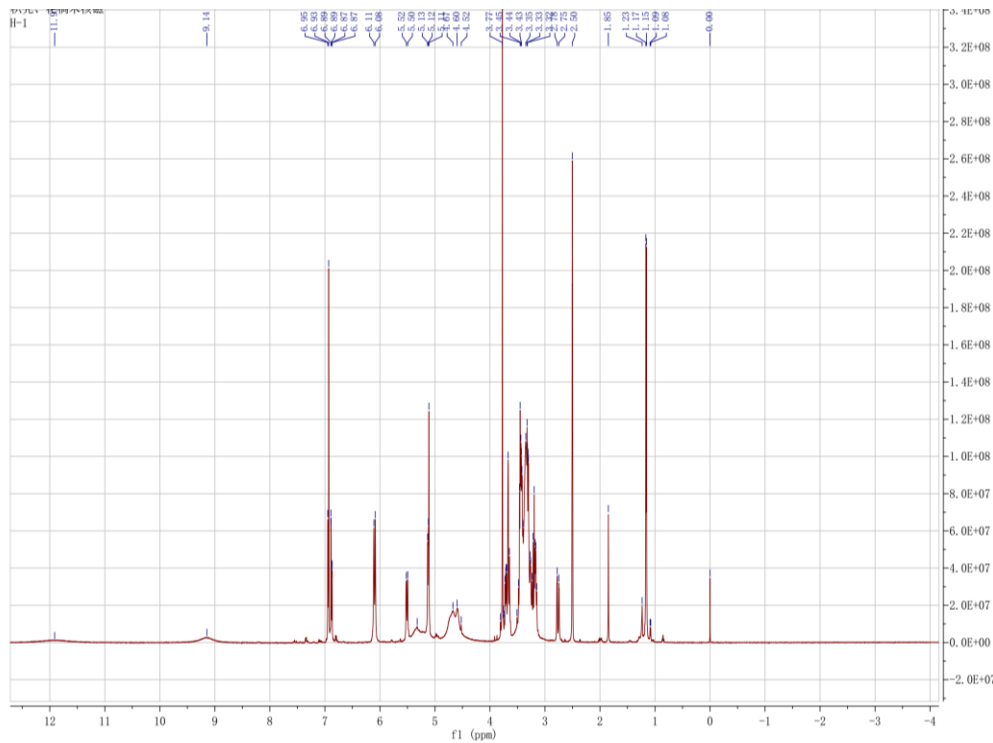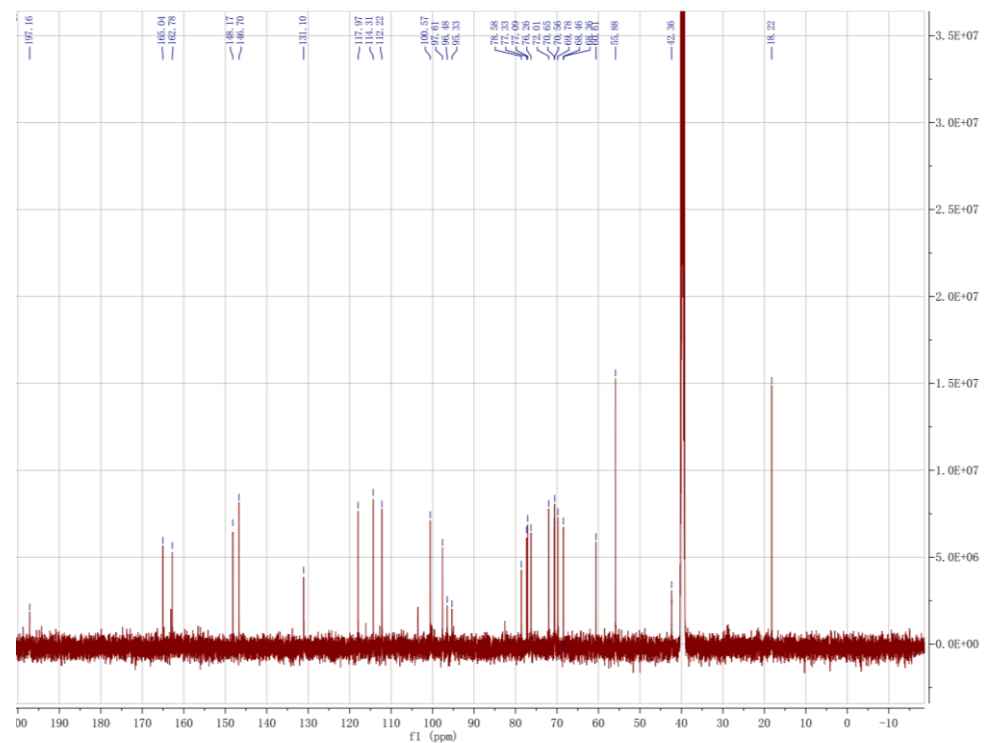

### Compound 3: meranzin

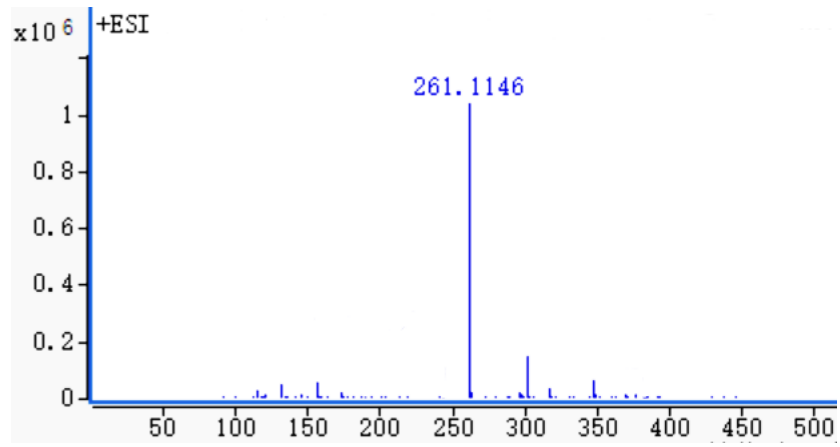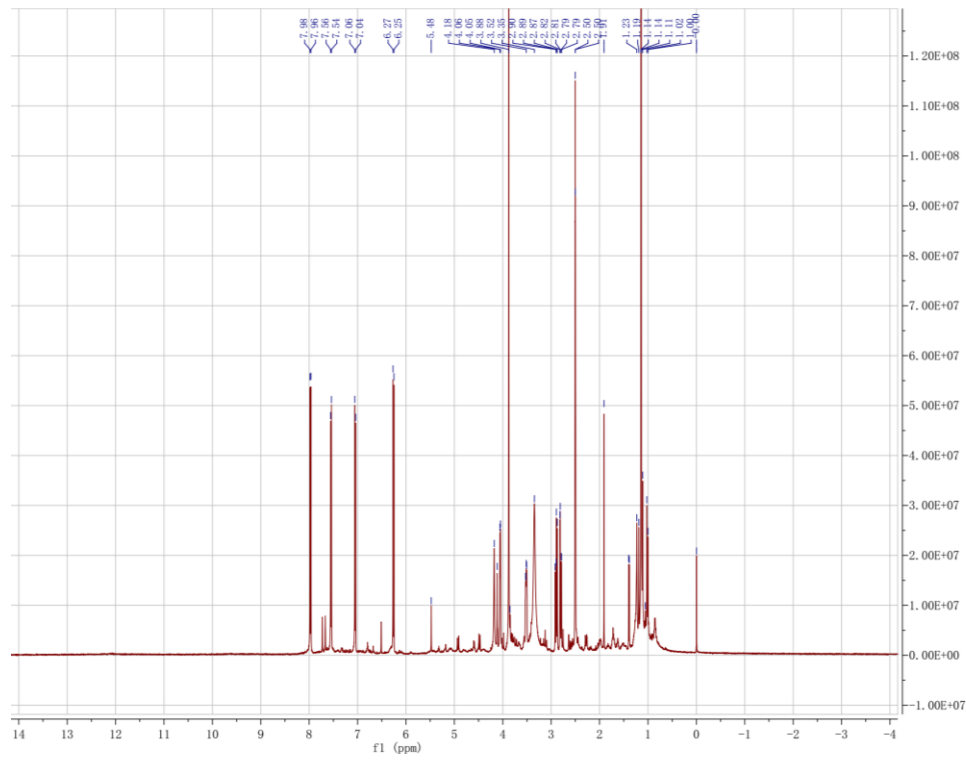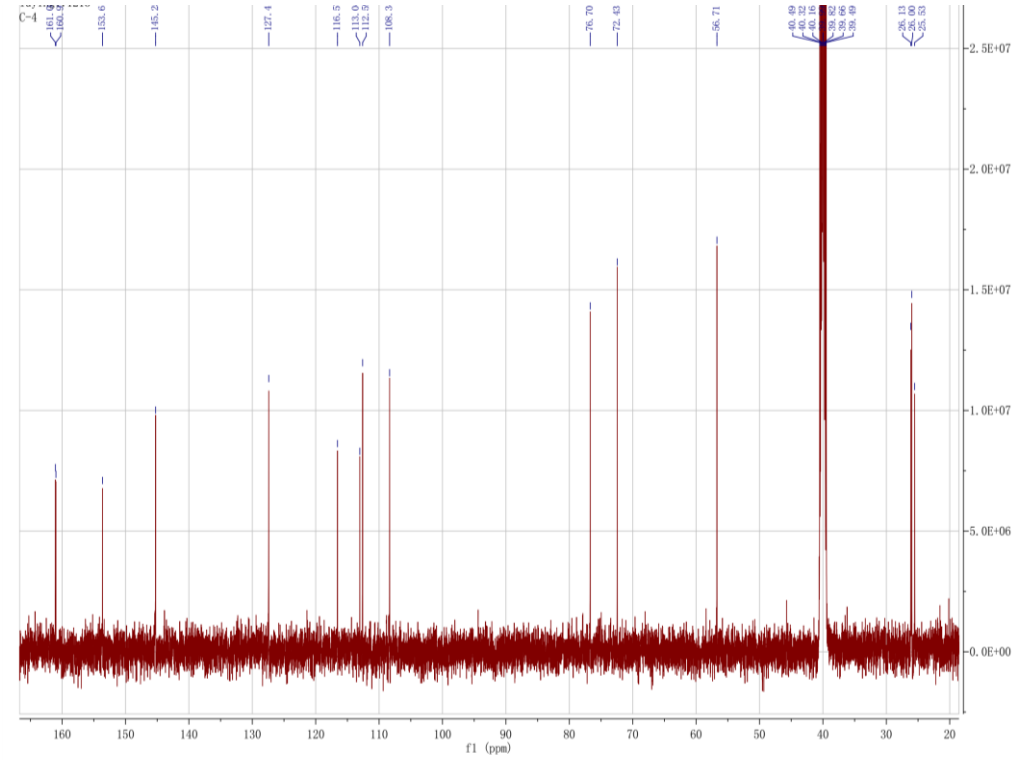





# Compound 5: meranzin hydrate

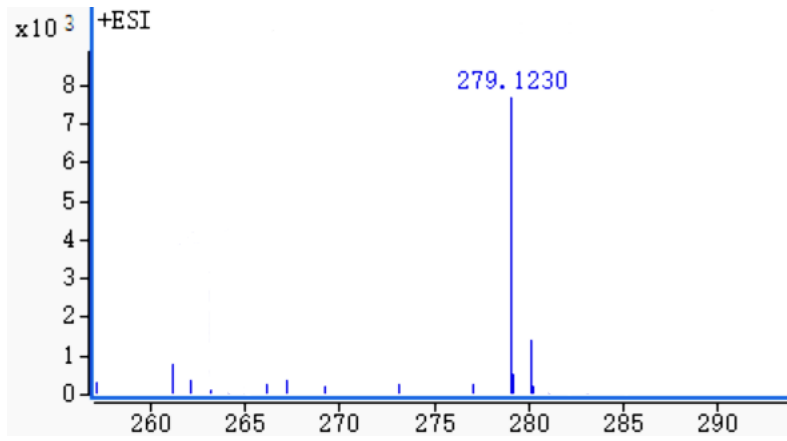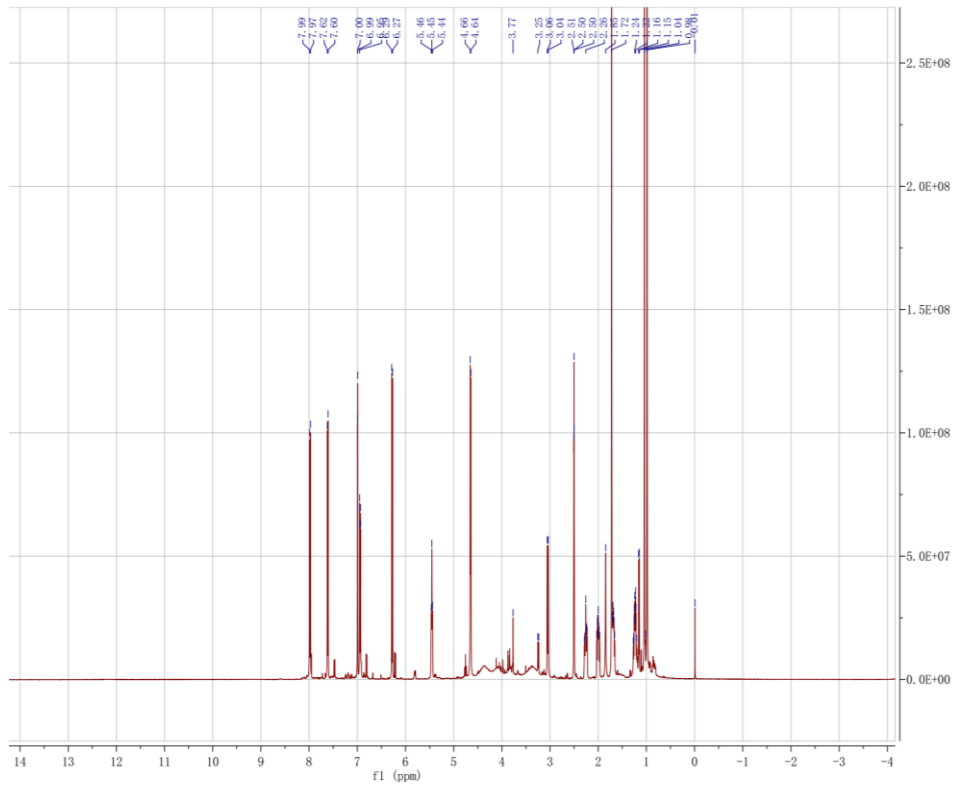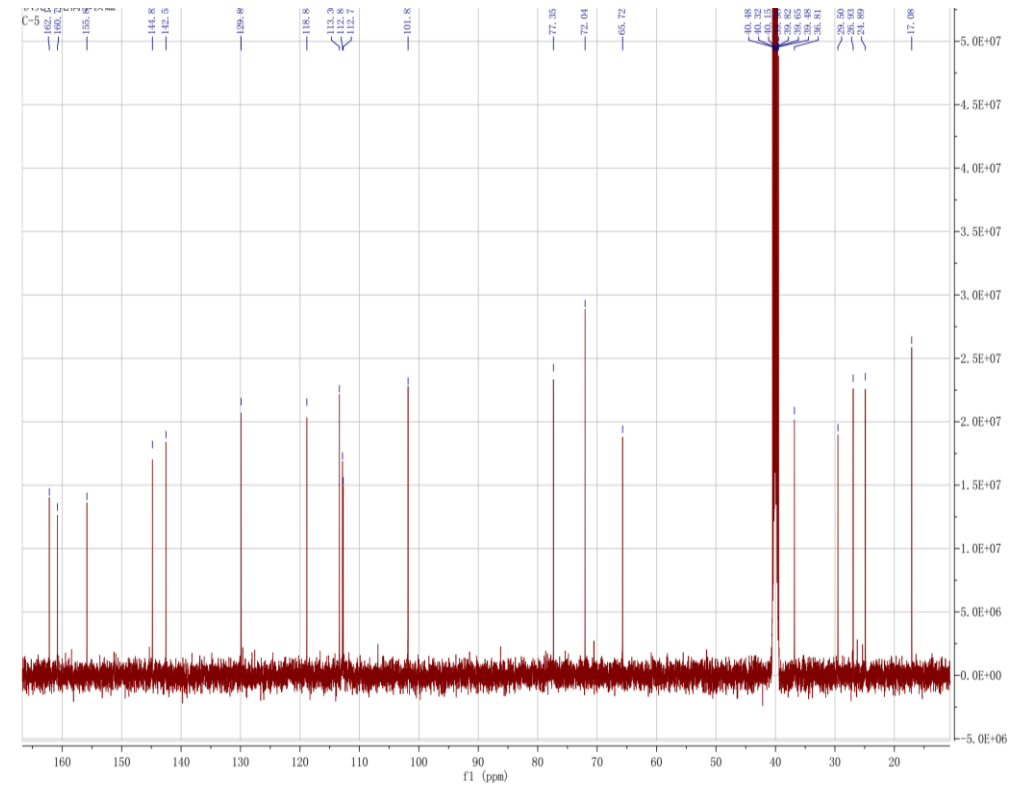



# Compound 7: nobiletin

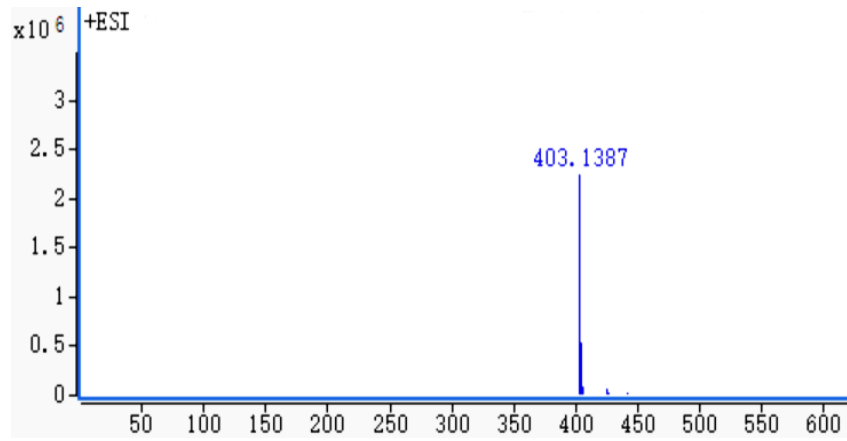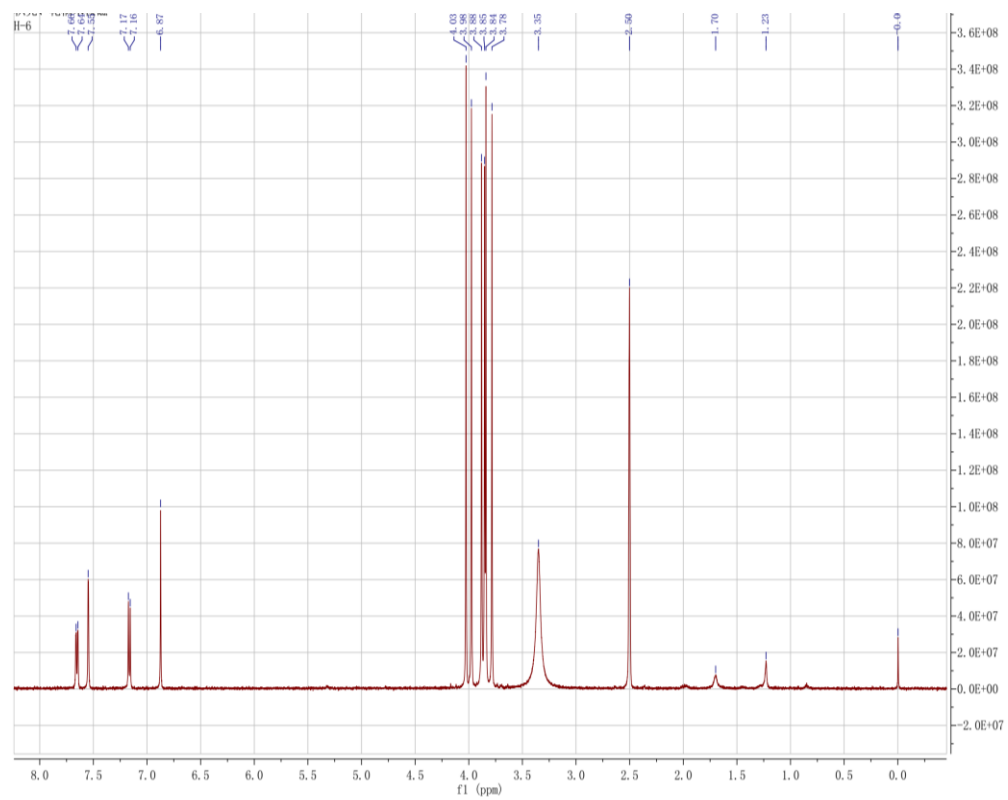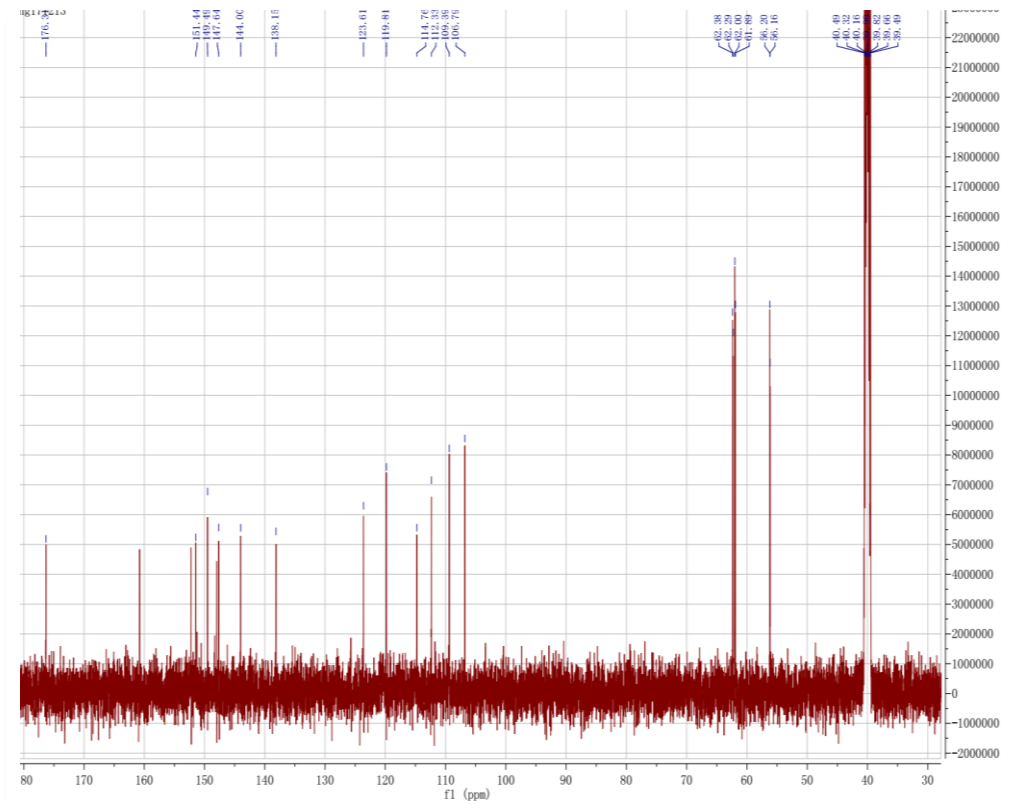

# Compound 8: tangeretin

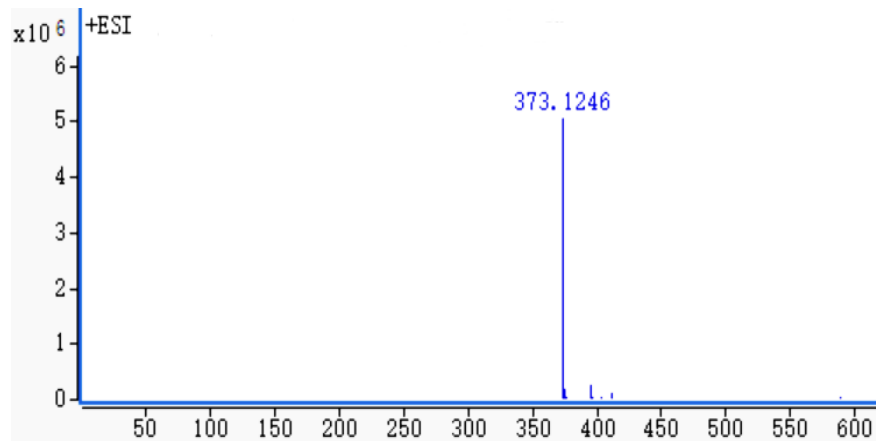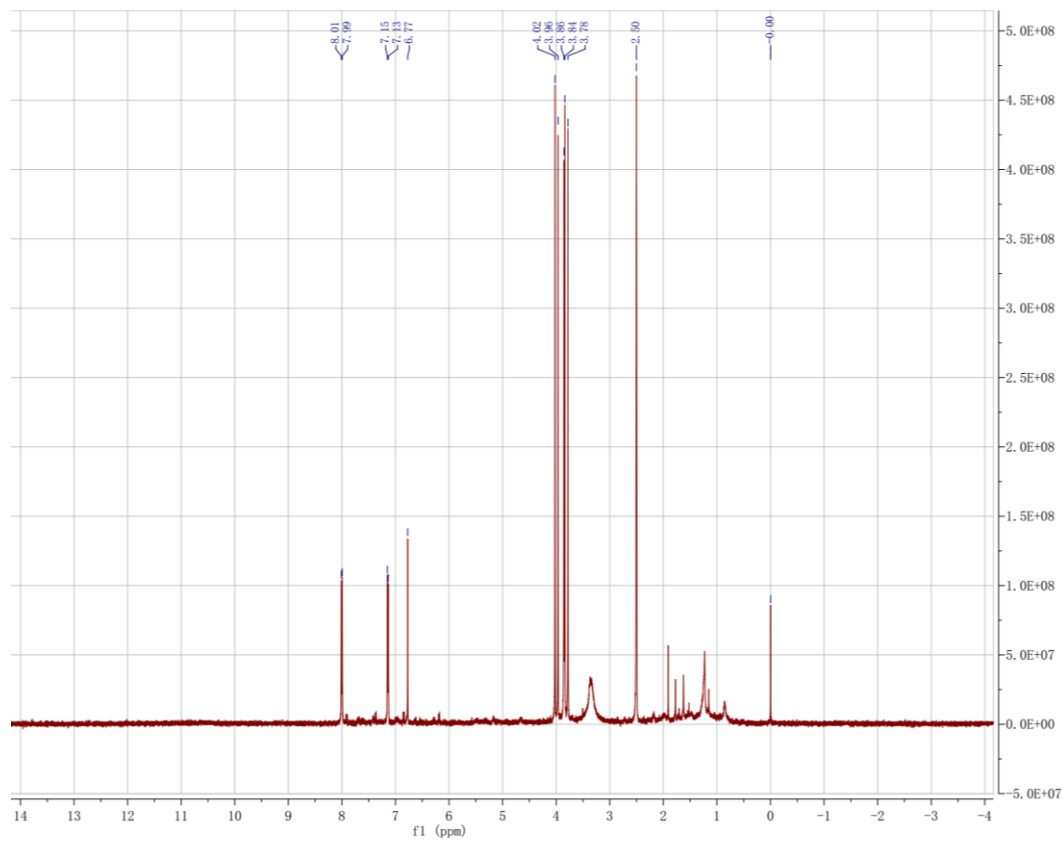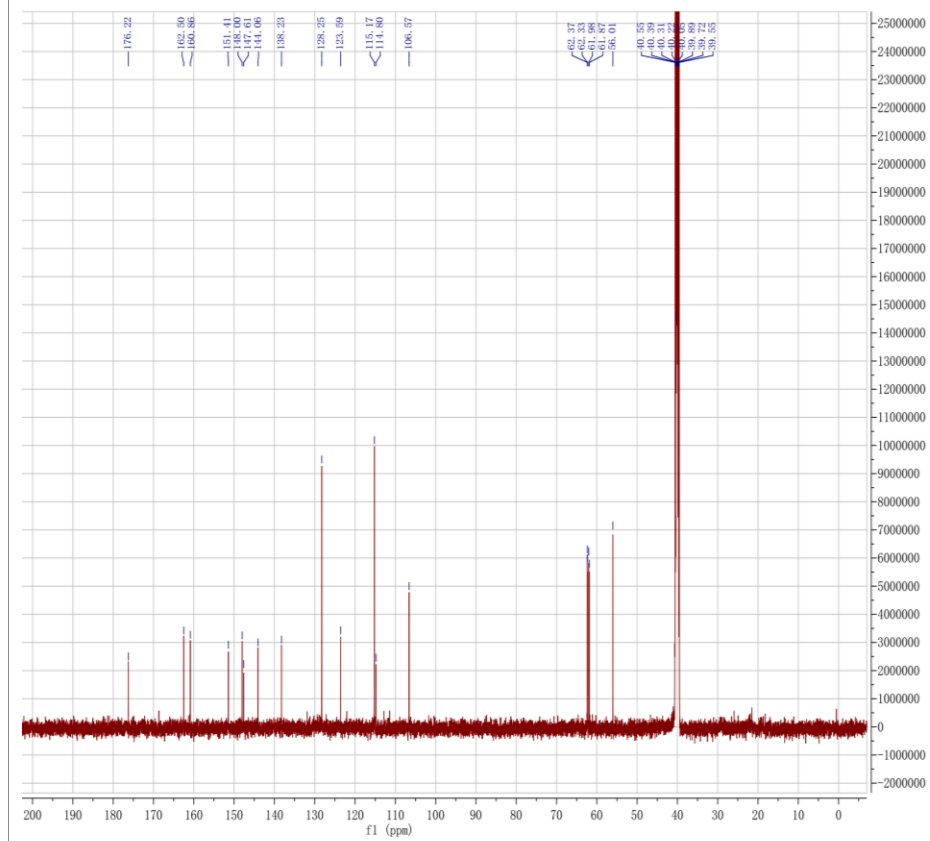

**Compound 1:** deprotonated molecule at m/z 579.1694 [M - H]<sup>-</sup> with chemical formula C<sub>27</sub>H<sub>32</sub>O<sub>14</sub>; <sup>1</sup>H-NMR (500 MHz, DMSO-d<sub>6</sub>) δ: 12.04 (1H, s, 5-OH), 9.66 (1H, s, 4'-OH), 7.33 (2H, dd, J=8.5, 4.0 Hz, H-2', 6'), 6.80 (2H, d, J=8.5 Hz, H-3', 5'), 6.12 (1H, d, J=2.0 Hz, H-8), 6.08 (1H, t, J=6.0 Hz, H-6), 5.51 (1H, m, H-1''), 5.12 (1H, m, H-1'''), 3.18 (1H, m, H-3), 2.72 (1H, m, H-6'''), 3.67 (3H, m), 3.45 (4H, m), 3.35 (1H, m, H-3α), 3.20 (1H, m), 4.68 (1H, s, OH), 4.59 (1H, OH); <sup>13</sup>C-NMR (DMSO-d<sub>6</sub>) δ: 79.09 (C-2), 42.33 (C-3), 197.67 (C-4), 163.41 (C-5), 96.78 (C-6), 165.34 (C-7), 95.57 (C-8), 163.23 (C-9), 103.78 (C-10), 129.10 (C-1'), 129.01 (C-2'), 115.54 (C-3'), 158.31 (C-4'), 115.68 (C-5'), 128.91 (C-6'), 97.88 (C-1''), 77.61 (C-2''), 77.36 (C-3''), 69.79 (C-4''), 76.54 (C-5''), 60.89 (C-6''), 100.85 (C-1'''), 70.85 (C-2'''), 70.93 (C-3'''), 72.33 (C-4'''), 68.75 (C-5'''), 18.51 (C-6''').

**Compound 2:** deprotonated molecule at m/z 609.1789 [M - H]<sup>-</sup> with chemical formula C<sub>28</sub>H<sub>34</sub>O<sub>15</sub>; <sup>1</sup>H-NMR (500 MHz, DMSO-d<sub>6</sub>) δ: 11.91 (1H, s, 5-OH), 9.14 (1H, s, 3'-OH), 6.95 (1H, s, H-5'), 6.93 (1H, s, H-2'), 6.88 (1H, dd, J=10.0, 1.5 Hz, H-6'), 6.11 (1H, s, H-6), 6.08 (1H, s, H-8), 5.52 (1H, dd, J=4.0, 2.0 Hz, H-2), 5.33 (1H, s, OH), 5.12 (1H, d, J=2.0 Hz, H-1''), 5.11 (1H, s, H-1'''), 4.74 (1H, s, OH), 4.60 (1H, s, OH), 4.52 (1H, OH), 3.77 (3H, s, 4'-OCH<sub>3</sub>), 3.67 (3H, m), 3.45 (4H, m), 3.35 (1H, m, H-3α), 3.20 (1H, m), 2.76 (1H, dd, J=4.0, 2.0 Hz, H-3β), 1.14 (3H, d, J=6.5 Hz, H-6'''); <sup>13</sup>C-NMR (DMSO-d<sub>6</sub>) δ: 78.58 (C-2), 42.36 (C-3), 197.16 (C-4), 162.78 (C-5), 96.48 (C-6), 165.04 (C-7), 95.33 (C-8), 162.78 (C-9), 117.97, 103.20 (C-10), 131.10 (C-1'), 112.22 (C-2'), 146.70 (C-3'), 148.17 (C-4'), 114.31 (C-5'), 100.57 (C-1''), 76.26 (C-2''), 77.33 (C-3''), 69.78 (C-4''), 77.09 (C-5''), 97.61 (C-1'''), 70.56 (C-2'''), 70.65 (C-3'''), 72.01 (C-4'''), 68.46 (C-5'''), 18.22 (C-6'''), 55.88 (4'-OCH<sub>3</sub>), 60.61 (C-6').

**Compound 3:** protonated molecule at m/z 261.1146 [M + H]<sup>+</sup> with chemical formula C<sub>15</sub>H<sub>16</sub>O<sub>4</sub>; <sup>1</sup>H-NMR (500 MHz, DMSO-d<sub>6</sub>) δ: 7.97 (1H, d, J=8.0 Hz, H-4), 7.55 (1H, d, J=8.5 Hz, H-5), 7.05 (1H, d, J=8.5 Hz, H-6), 6.26 (1H, d, J=9.5 Hz, H-3), 3.51 (1H, m, H-2'), 2.89 (1H, dd, J=12.5, 2.0 Hz, H-1'), 2.80 (1H, dd, J=12.5, 2.0 Hz, H-1''), 3.88 (3H, s, 7-OCH<sub>3</sub>), 1.14 (6H, d, J=3.0 Hz, 4'-CH<sub>3</sub>, 5'-CH<sub>3</sub>); <sup>13</sup>C-NMR (DMSO-d<sub>6</sub>) δ: 161.05 (C-2), 160.97 (C-7), 153.61 (C-9), 145.25 (C-4), 127.41 (C-5), 108.34 (C-8), 116.57 (C-10), 113.04 (C-3), 112.59 (C-6), 56.71 (OCH<sub>3</sub>), 76.70 (C-2'), 72.43 (C-3'), 26.13 (C-1'), 26.00 (3'-CH<sub>3</sub>), 25.53 (3'-CH<sub>3</sub>).

**Compound 4:** deprotonated molecule at m/z 593.1840 [M - H]<sup>-</sup> with chemical formula C<sub>28</sub>H<sub>34</sub>O<sub>14</sub>; <sup>1</sup>H-NMR (500 MHz, DMSO-d<sub>6</sub>) δ: 12.05 (1H, s, 5-OH), 7.45 (2H, d, J=9.0 Hz, H-2', 6'), 6.98 (2H, d, J=8.5 Hz, H-3', 5'), 6.13 (1H, d, J=2.5 Hz, H-8), 6.09 (1H, d, J=2.0 Hz, H-6), 5.59 (1H, dd, J=12.5, 2.0 Hz, H-2), 5.14 (1H, d, J=7.0 Hz, H-1''), 5.11 (1H, s, J=9.5 Hz, H-1'''), 3.77 (3H, s, 4'-OCH<sub>3</sub>), 2.78 (1H, dd, J=12.5, 3.5 Hz, H-3β), 1.15 (3H, d, J=6.5 Hz, H-6'''-CH<sub>3</sub>), 3.26-3.40 (10H); <sup>13</sup>C-NMR (125 MHz, DMSO-d<sub>6</sub>) δ: 42.56 (C-3), 197.53 (C-4), 165.35 (C-7), 163.39 (C-5), 163.11 (C-9), 160.00 (C-4'), 103.20 (C-10), 130.86 (C-2', 6'), 128.83 (C-1'), 114.29 (C-3', 5'), 100.78 (C-1'''), 97.76 (C-1''), 96.90 (C-6), 95.62 (C-8), 78.83 (C-2), 77.42 (C-5''), 76.54 (C-3''), 72.27 (C-2''), 70.93 (C-2'''), 70.84 (C-4''), 70.04 (C-3'''), 68.75 (C-5'''), 60.83 (C-6''), 18.5 (C-6'''), 55.67 (4'-OCH<sub>3</sub>).

**Compound 5:** protonated molecule at m/z 279.1230 [M + H]<sup>+</sup> with chemical formula C<sub>15</sub>H<sub>18</sub>O<sub>5</sub>; <sup>1</sup>H-NMR (500 MHz, DMSO-d<sub>6</sub>) δ: 7.98 (1H, d, J=9.5 Hz, H-4), 7.61 (1H, d, J=8.5 Hz, H-5), 6.95 (1H, m, H-6), 6.27 (1H, d, J=8.5 Hz, H-3), 4.65 (3H, d, J=9.6, 7-OCH<sub>3</sub>), 3.77 (1H, m, -CH), 3.24 (1H, d, J=2.0 Hz, OH), 3.50 (1H, s, OH), 3.05 (1H, d, J=13.2 Hz, 1'-CH<sub>2</sub>), 1.02 (3H, s, 4'-CH<sub>3</sub>), 0.92 (3H, s, 5'-CH<sub>3</sub>); <sup>13</sup>C-NMR (DMSO-d<sub>6</sub>) δ: 162.17 (C-2), 160.79 (C-7), 155.85 (C-9), 144.82 (C-4), 129.89 (C-5), 118.84 (C-8), 113.36 (C-8), 112.84 (C-3), 101.82 (C-6), 77.35 (C-2'), 71.95 (C-3'), 29.50 (C-1'), 26.93 (C-4'), 24.89 (C-5').

**Compound 6:** protonated molecule at m/z 261.1143 [M + H]<sup>+</sup> with chemical formula C<sub>15</sub>H<sub>16</sub>O<sub>4</sub>; <sup>1</sup>H-NMR (500 MHz, DMSO-d<sub>6</sub>) δ: 8.00 (1H, d, J=9.0 Hz, H-4), 7.63 (1H, d, J=8.5 Hz, H-5), 7.08 (1H, dd, J=2.5 Hz, H-6), 6.27 (1H, d, J=9.5 Hz, H-3), 3.91 (1H, s, H-2'), 2.83 (1H, m, H-1'), 3.91 (3H, s, 7-OCH<sub>3</sub>), 1.16 (3H, s, 4'-CH<sub>3</sub>), 1.11 (3H, s, 5'-CH<sub>3</sub>); <sup>13</sup>C-NMR (DMSO-d<sub>6</sub>) δ: 210.72 (C-2'), 160.48 (C-2), 128.53 (C-5), 112.96 (C-8), 112.74 (C-10), 111.64 (C-3), 160.46 (C-7), 153.14 (C-9), 145.18 (C-4), 108.34 (C-6), 19.99 (C-4', C-5'), 34.88 (C-1'), 56.79 (OCH<sub>3</sub>).

**Compound 7:** protonated molecule at m/z 403.1387 [M + H]<sup>+</sup> with chemical formula C<sub>21</sub>H<sub>22</sub>O<sub>8</sub>; <sup>1</sup>H-NMR (500 MHz, DMSO-d<sub>6</sub>) δ: 6.87 (1H, s, H-3), 7.55 (1H, d, J=1.5 Hz, H-2'), 7.16 (1H, d, J=8.5 Hz, H-5'), 7.65 (1H, dd, J=8.5, 1.5 Hz, H-6'), 4.03 (3H, s, OCH<sub>3</sub>), 3.98 (3H, s, OCH<sub>3</sub>), 3.88 (3H, s, OCH<sub>3</sub>), 3.85 (3H, s, OCH<sub>3</sub>), 3.84 (3H, s, OCH<sub>3</sub>), 3.78 (3H, s, OCH<sub>3</sub>); <sup>13</sup>C-NMR (DMSO-d<sub>6</sub>) δ: 160.76 (C-2), 106.28 (C-3), 176.31 (C-4), 144.00 (C-5), 149.49 (C-6), 138.01 (C-7), 148.08 (C-8), 147.64 (C-9), 109.39 (C-10), 123.61 (C-1'), 111.33 (C-2'), 152.15 (C-3'), 151.37 (C-4'), 114.76 (C-5'), 119.81 (C-6'), 62.38 (5-OCH<sub>3</sub>), 62.29 (6-OCH<sub>3</sub>), 62.00 (7-OCH<sub>3</sub>), 61.89 (8-OCH<sub>3</sub>), 56.20 (3'-OCH<sub>3</sub>), 56.16 (4'-OCH<sub>3</sub>).

**Compound 8:** protonated molecule at m/z 373.1246 [M + H]<sup>+</sup> with chemical formula C<sub>20</sub>H<sub>20</sub>O<sub>7</sub>; <sup>1</sup>H-NMR (500 MHz, DMSO-d<sub>6</sub>) δ: 6.77 (1H, s, H-3), 8.00 (2H, d, J=3.5 Hz, H-2', H-6'), 7.14 (2H, d, J=5.1 Hz, H-3', H-5'), 4.02 (3H, s, OCH<sub>3</sub>), 3.96 (3H, s, OCH<sub>3</sub>), 3.86 (3H, s, OCH<sub>3</sub>), 3.84 (3H, s, OCH<sub>3</sub>), 3.78 (3H, s, OCH<sub>3</sub>); <sup>13</sup>C-NMR (DMSO-d<sub>6</sub>) δ: 162.50 (C-2), 106.57 (C-3), 176.22 (C-4), 144.06 (C-5), 151.41 (C-6), 138.23 (C-7), 147.61 (C-8), 128.25 (C-2', C-6'), 123.59 (C-1'), 115.17 (C-3', C-5'), 114.80 (C-10), 147.61 (C-9), 160.86 (C-4'), 62.37 (5-OCH<sub>3</sub>), 62.33 (6-OCH<sub>3</sub>), 61.98 (7-OCH<sub>3</sub>), 61.87 (8-OCH<sub>3</sub>), 56.01 (4'-OCH<sub>3</sub>).
